# Supplementary material for: Evaluating epistatic interaction signals in complex traits using quantitative traits
Source: PubMed Central journal article supplement (PMC2795985; doi:10.1186/1753-6561-3-s7-s82), 2009-12-15
Supplement: 1753-6561-3-S7-S82-S1.pdf [file 1753-6561-3-S7-S82-S1.pdf]

**Supplemental File 1 - SNPs used in this study**

| Chromosome | Marker <sup>a</sup> | SNP no.    | Position  | Gene           |
|------------|---------------------|------------|-----------|----------------|
| 1          | 1                   | rs6586516  | 17498118  | <i>PADI4</i>   |
| 1          | 2                   | rs2477142  | 17501591  | <i>PADI4</i>   |
| 1          | 3                   | rs2501787  | 17503314  | <i>PADI4</i>   |
| 1          | 4                   | rs1886302  | 17507983  | <i>PADI4</i>   |
| 1          | 5                   | rs2147333  | 17519113  | <i>PADI4</i>   |
| 1          | 6                   | rs1635586  | 17537357  | <i>PADI4</i>   |
| 1          | 7                   | rs11203368 | 17539095  | <i>PADI4</i>   |
| 1          | 8                   | rs2240337  | 17546809  | <i>PADI4</i>   |
| 1          | 9                   | rs6683201  | 17553864  | <i>PADI4</i>   |
| 1          | 10                  | rs2428735  | 17557761  | <i>PADI4</i>   |
| 1          | 11                  | rs3789607  | 114167957 | <i>PTPN22</i>  |
| 2          | 1                   | rs6740131  | 191597827 | <i>STAT4</i>   |
| 2          | 2                   | rs3024912  | 191601332 | <i>STAT4</i>   |
| 2          | 3                   | rs3024908  | 191602386 | <i>STAT4</i>   |
| 2          | 4                   | rs3024896  | 191604961 | <i>STAT4</i>   |
| 2          | 5                   | rs16833215 | 191622044 | <i>STAT4</i>   |
| 2          | 6                   | rs3771327  | 191629016 | <i>STAT4</i>   |
| 2          | 7                   | rs1517352  | 191639709 | <i>STAT4</i>   |
| 2          | 8                   | rs1400656  | 191643278 | <i>STAT4</i>   |
| 2          | 9                   | rs2459611  | 191647432 | <i>STAT4</i>   |
| 2          | 10                  | rs16833239 | 191648505 | <i>STAT4</i>   |
| 2          | 11                  | rs4555370  | 191699704 | <i>STAT4</i>   |
| 2          | 12                  | rs7572482  | 191723317 | <i>STAT4</i>   |
| 2          | 13                  | rs926169   | 204430997 | <i>CTLA4</i>   |
| 2          | 14                  | rs231726   | 204449111 | <i>CTLA4</i>   |
| 5          | 1                   | rs2277025  | 156392673 | <i>HAVCRI</i>  |
| 5          | 2                   | rs10038271 | 156402979 | <i>HAVCRI</i>  |
| 5          | 3                   | rs7706174  | 156407976 | <i>HAVCRI</i>  |
| 5          | 4                   | rs17573010 | 156410409 | <i>HAVCRI</i>  |
| 5          | 5                   | rs4704843  | 156423731 | <i>HAVCRI</i>  |
| 5          | 6                   | rs12152865 | 156436345 | <i>HAVCR2</i>  |
| 5          | 7                   | rs13176785 | 156448854 | <i>HAVCR2</i>  |
| 5          | 8                   | rs919747   | 156463908 | <i>HAVCR2</i>  |
| 5          | 9                   | rs162889   | 131652285 | <i>SLC22A4</i> |
| 5          | 10                  | rs2662314  | 131653068 | <i>SLC22A4</i> |
| 5          | 11                  | rs270613   | 131668482 | <i>SLC22A4</i> |
| 5          | 12                  | rs272893   | 131690961 | <i>SLC22A4</i> |
| 5          | 13                  | rs2073506  | 131422637 | <i>IL3</i>     |
| 5          | 14                  | rs2243288  | 132045843 | <i>IL4</i>     |
| 5          | 15                  | rs2243290  | 132046068 | <i>IL4</i>     |
| 6          | 1                   | rs2517912  | 219791923 | <i>HLA-F</i>   |
| 6          | 2                   | rs9258170  | 29797569  | <i>HLA-F</i>   |
| 6          | 3                   | rs9258186  | 29800313  | <i>HLA-F</i>   |

|   |    |            |          |                 |
|---|----|------------|----------|-----------------|
| 6 | 4  | rs2523404  | 29803692 | <i>HLA-F</i>    |
| 6 | 5  | rs2272874  | 29804224 | <i>HLA-F</i>    |
| 6 | 6  | rs1611350  | 29806800 | <i>HLA-F</i>    |
| 6 | 7  | rs1610601  | 29808162 | <i>HLA-F</i>    |
| 6 | 8  | rs7741100  | 29876102 |                 |
| 6 | 9  | rs2523790  | 29911629 | <i>HLA-G</i>    |
| 6 | 10 | rs2735007  | 29916178 | <i>HLA-G</i>    |
| 6 | 11 | rs762324   | 30563865 | <i>HLA-E</i>    |
| 6 | 12 | rs9264508  | 31341193 | <i>HLA-C</i>    |
| 6 | 13 | rs2524099  | 31344030 | <i>HLA-C</i>    |
| 6 | 14 | rs9394047  | 31344229 | <i>HLA-C</i>    |
| 6 | 15 | rs2249742  | 31348700 | <i>HLA-C</i>    |
| 6 | 16 | rs6906846  | 31353715 | <i>HLA-C</i>    |
| 6 | 17 | rs7453967  | 31422222 | <i>HLA-B</i>    |
| 6 | 18 | rs2156875  | 31425326 | <i>HLA-B</i>    |
| 6 | 19 | rs2395175  | 32513004 | <i>HLA-DRA</i>  |
| 6 | 20 | rs3129871  | 32514320 | <i>HLA-DRA</i>  |
| 6 | 21 | rs2239804  | 32519501 | <i>HLA-DRA</i>  |
| 6 | 22 | rs3129890  | 32522251 | <i>HLA-DRA</i>  |
| 6 | 23 | rs13199787 | 32813254 | <i>HLA-DQA2</i> |
| 6 | 24 | rs10807113 | 32830164 | <i>HLA-DQA2</i> |
| 6 | 25 | rs7774954  | 32832167 | <i>HLA-DQA2</i> |
| 6 | 26 | rs2856997  | 32889754 | <i>HLA-DOB</i>  |
| 6 | 27 | rs7383287  | 32891064 | <i>HLA-DOB</i>  |
| 6 | 28 | rs2071472  | 32892598 | <i>HLA-DOB</i>  |
| 6 | 29 | rs2857107  | 32893493 | <i>HLA-DOB</i>  |
| 6 | 30 | rs9501239  | 33003558 | <i>HLA-DMB</i>  |
| 6 | 31 | rs154978   | 33007274 | <i>HLA-DMB</i>  |
| 6 | 32 | rs3132131  | 33007463 | <i>HLA-DMB</i>  |
| 6 | 33 | rs154972   | 33008629 | <i>HLA-DMB</i>  |
| 6 | 34 | rs181997   | 33008696 | <i>HLA-DMB</i>  |
| 6 | 35 | rs3132132  | 33009912 | <i>HLA-DMB</i>  |
| 6 | 36 | rs68600    | 33011702 | <i>HLA-DMB</i>  |
| 6 | 37 | rs151719   | 33011878 | <i>HLA-DMB</i>  |
| 6 | 38 | rs171329   | 33012639 | <i>HLA-DMB</i>  |
| 6 | 39 | rs1480380  | 33021224 | <i>HLA-DMA</i>  |
| 6 | 40 | rs3135029  | 33029752 | <i>HLA-DMA</i>  |
| 6 | 41 | rs9378127  | 33030437 | <i>HLA-DMA</i>  |
| 6 | 42 | rs209474   | 33032562 | <i>HLA-DMA</i>  |
| 6 | 43 | rs176248   | 33073920 | <i>HLA-DOA</i>  |
| 6 | 44 | rs206762   | 33078428 | <i>HLA-DOA</i>  |
| 6 | 45 | rs3128931  | 33079686 | <i>HLA-DOA</i>  |
| 6 | 46 | rs3129304  | 33081721 | <i>HLA-DOA</i>  |
| 6 | 47 | rs86567    | 33084737 | <i>HLA-DOA</i>  |
| 6 | 48 | rs403414   | 33085293 | <i>HLA-DOA</i>  |
| 6 | 49 | rs3763342  | 33086975 | <i>HLA-DOA</i>  |

|   |    |           |          |                 |
|---|----|-----------|----------|-----------------|
| 6 | 50 | rs9276991 | 33089826 | <i>HLA-DOA</i>  |
| 6 | 51 | rs3130604 | 33093030 | <i>HLA-DOA</i>  |
| 6 | 52 | rs6933994 | 33095098 | <i>HLA-DOA</i>  |
| 6 | 53 | rs9296068 | 33096673 |                 |
| 6 | 54 | rs763469  | 33112365 |                 |
| 6 | 55 | rs2395309 | 33134224 | <i>HLA-DPA1</i> |
| 6 | 56 | rs3077    | 33141000 | <i>HLA-DPA1</i> |
| 6 | 57 | rs2301226 | 33142574 | <i>HLA-DPA1</i> |
| 6 | 58 | rs1126534 | 33145617 | <i>HLA-DPA1</i> |
| 6 | 59 | rs1431399 | 33149012 | <i>HLA-DPA1</i> |
| 6 | 60 | rs987870  | 33150858 | <i>HLA-DPA1</i> |
| 6 | 61 | rs9277565 | 33164875 | <i>HLA-DPBI</i> |
| 6 | 62 | rs2281390 | 33167647 | <i>HLA-DPBI</i> |
| 6 | 63 | rs2281388 | 33168096 | <i>HLA-DPBI</i> |
| 6 | 64 | rs3117222 | 33168927 | <i>HLA-DPBI</i> |
| 6 | 65 | rs3128918 | 33169076 | <i>HLA-DPBI</i> |
| 6 | 66 | rs3130192 | 33169908 | <i>HLA-DPBI</i> |

---

<sup>a</sup>The marker number assigned to each SNP corresponds to the numbers in the LD plot in Figure 1.
